# Supplementary material
Source: PubMed Central journal article supplement (PMC5791150)

**Supplemental Table 1:****Clinical Characteristics**

|             | <b>Source</b> | <b>Status</b> | <b>karyotype</b> | <b>blast%</b> | <b>CD34%</b> | <b>FLT3/ITD</b> | <b>NPM1</b> | <b>Age</b> | <b>Sex</b> |
|-------------|---------------|---------------|------------------|---------------|--------------|-----------------|-------------|------------|------------|
| <b>AML1</b> | BM            | diagnosis     | Complex          | 93%           | 81%          | Negative        | Negative    | 71         | Female     |
| <b>AML2</b> | Leukapheresis | diagnosis     | Normal           | 90%           | 0%           | Negative        | Negative    | 46         | Male       |
| <b>AML3</b> | Leukapheresis | diagnosis     | Complex          | 95%           | 56%          | Negative        | Negative    | 70         | Male       |
| <b>AML4</b> | BM            | diagnosis     | t(8;21)          | 70%           | 100%         | Negative        | Negative    | 52         | Male       |
| <b>AML5</b> | BM            | diagnosis     | Normal           | 83%           | 0%           | Negative        | Positive    | 54         | Male       |
| <b>AML6</b> | BM            | diagnosis     | Normal           | 70%           | 0%           | Negative        | Positive    | 54         | Female     |

**Supplemental Table 2: Table of PCR Primers**

| <b>Primer</b>      | <b>Company</b>            | <b>Catalogue No.</b> |
|--------------------|---------------------------|----------------------|
| 18s                | Qiagen                    | QF00451850           |
| $\beta$ -actin     | Qiagen                    | QT01680476           |
| DICER              | Qiagen                    | QT00015176           |
| GAPDH              | Qiagen                    | QT00079247           |
| JUN                | Qiagen                    | QT00242956           |
| miR-34a            | Qiagen                    | MS00003318           |
| precursor-mir-34a  | Qiagen                    | MP00002044           |
| miR-200c           | Qiagen                    | MS00003752           |
| precursor-mir-200c | Qiagen                    | MP00001414           |
|                    | <b>Left</b>               | <b>Right</b>         |
| Mouse MUC1         | CTGCTCCTCACAGTGCTTACAGTTG | TGAACCGGGGCTGTGGCTGG |
| DICER1             | AATTGTTTCCCGGAGAGCTT      | GGGCCACCATCTATTTCTCA |
| DICER2             | AGAGAGGCCGTGTCTCAAAA      | GAATCCATCATGGCTGCTTT |
| DICER3             | CCTCTTGGCTGTTTCTCTGG      | ACAGGGCTCTGTCTGAGCAT |
| c-Jun              | GCCCGAGCTCAACACTTATC      | CATTACCTCATCCCGTGAGC |

Supplemental Figure 1

A.

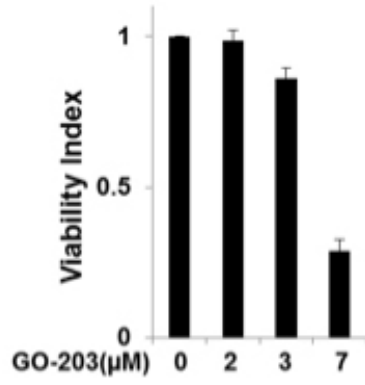

B.

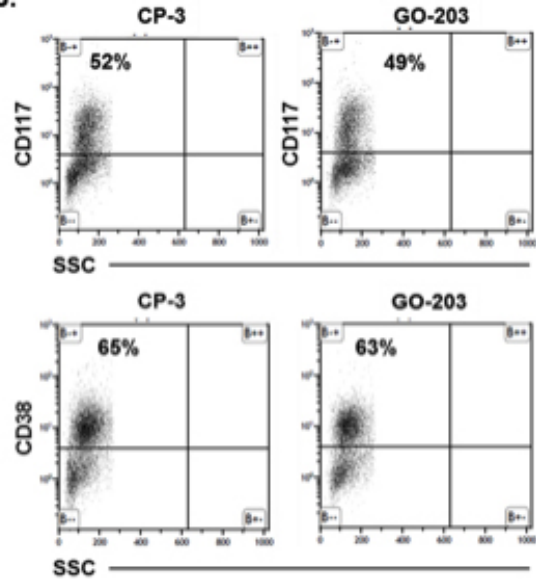

Supplemental Figure 2

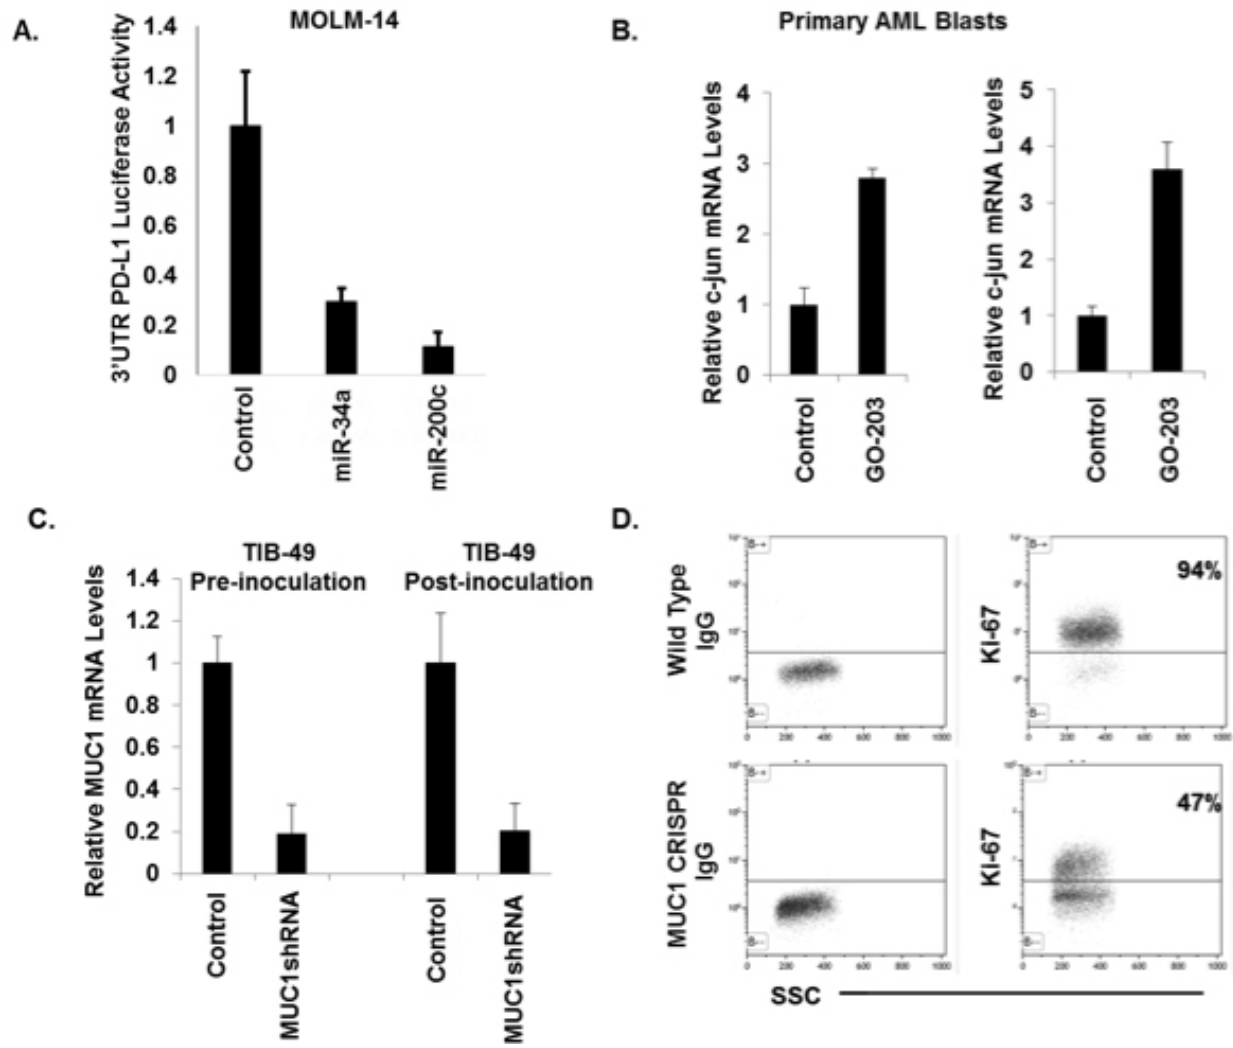

Supplement: NIHMS936839-supplement-SUPPLEMENTAL.pdf [file NIHMS936839-supplement-SUPPLEMENTAL.pdf]
